# Supplementary material
Source: Springer Nature journal article supplement (https://www.springermedizin.de/resource/supplementary/12888_2013_1573_MOESM2_ESM.pdf/9481406)

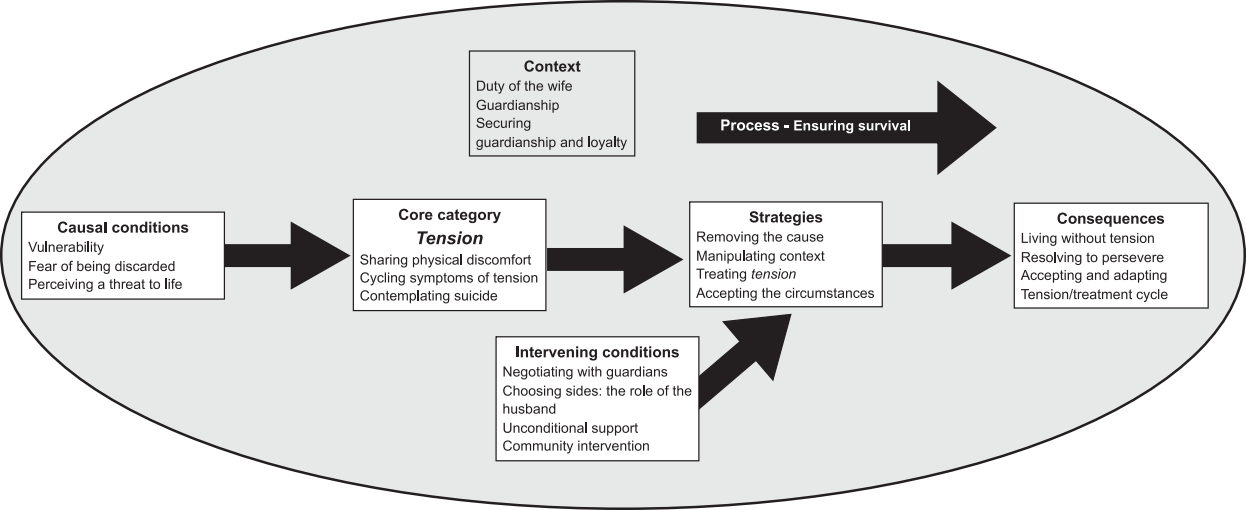

Supplement: MOESM2 [file 9481406]
